# Supplementary material for: Rapid detection of colistin resistance protein MCR-1 by LC–MS/MS
Source: PubMed Central journal article supplement (PMC6390366; doi:10.1186/s12014-019-9228-2), 2019-02-26
Supplement: 12014_2019_9228_MOESM1_ESM.pdf [file 12014_2019_9228_MOESM1_ESM.pdf]

**SUPPLEMENTARY MATERIAL**

**Rapid Detection of Colistin Resistance Protein MCR-1 by LC-MS/MS**

Honghui Wang, Yong Chen, Jeffrey R. Strich, Steven K. Drake, Jung-Ho Youn, Avi Z. Rosenberg, Marjan Gucek,

Patrick T. McGann, Anthony F. Suffredini, John P. Dekker

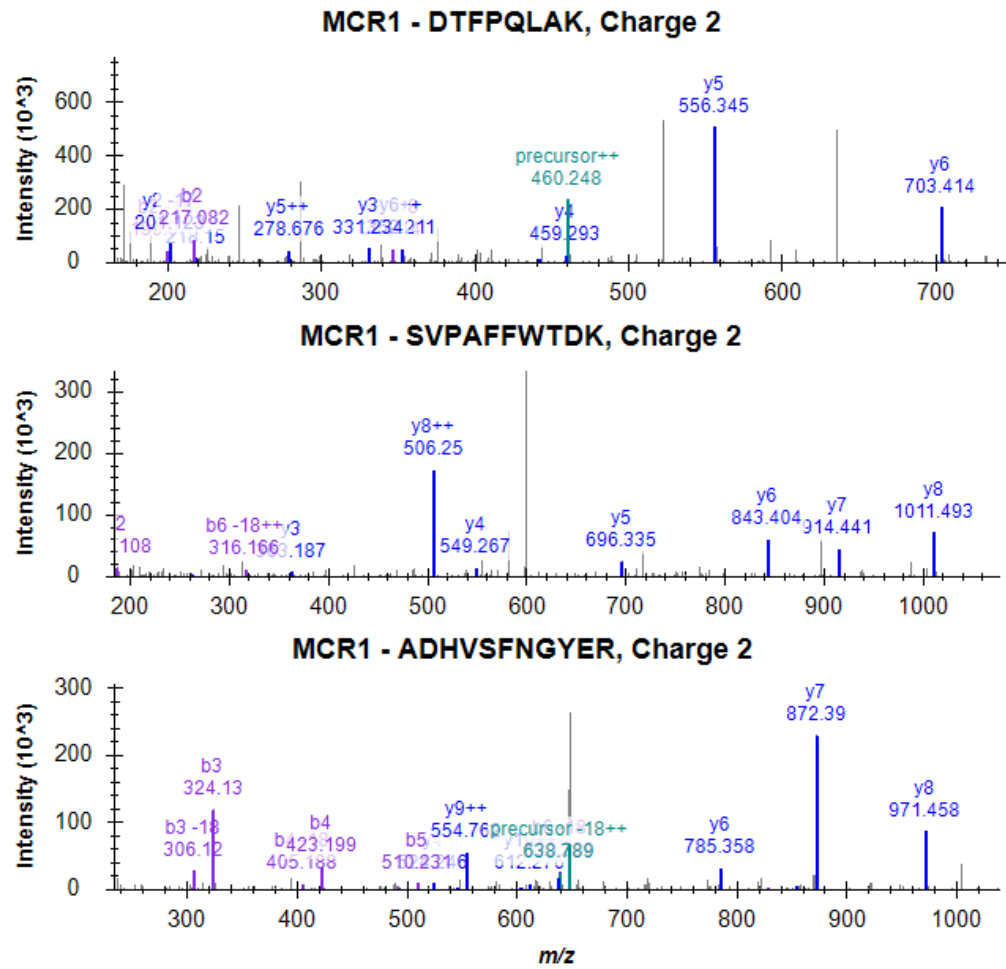

Supplemental Figure 1: MS/MS spectra acquired by Orbitrap Lumos LC-MS for three peptide markers.

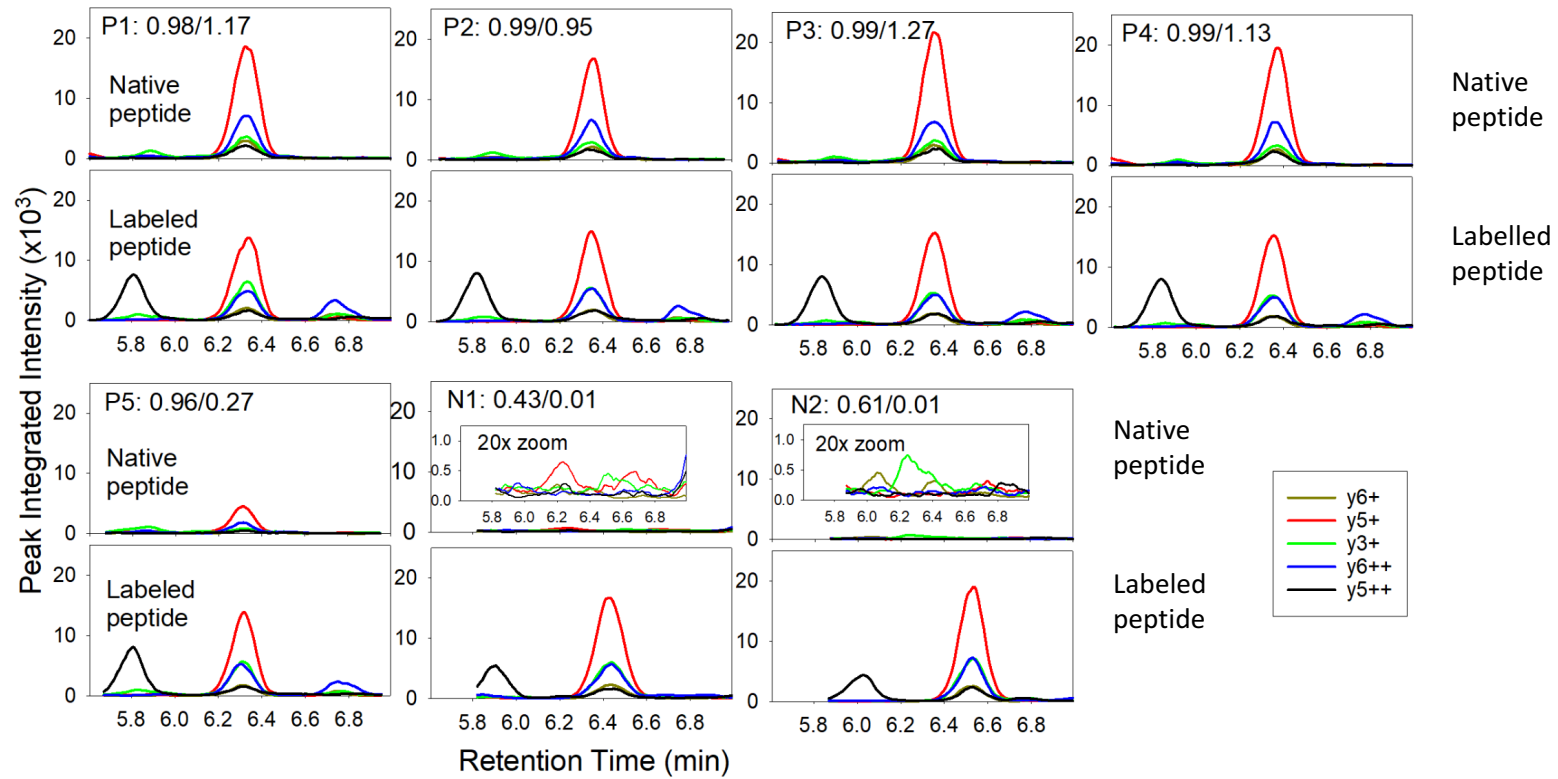

Supplemental Figure 2a: LC-MS chromatograms of DTFPQLAK for the five *mcr-1*-containing isolates (P1-P5) and two negative controls (N1 and N2) used in assay development.

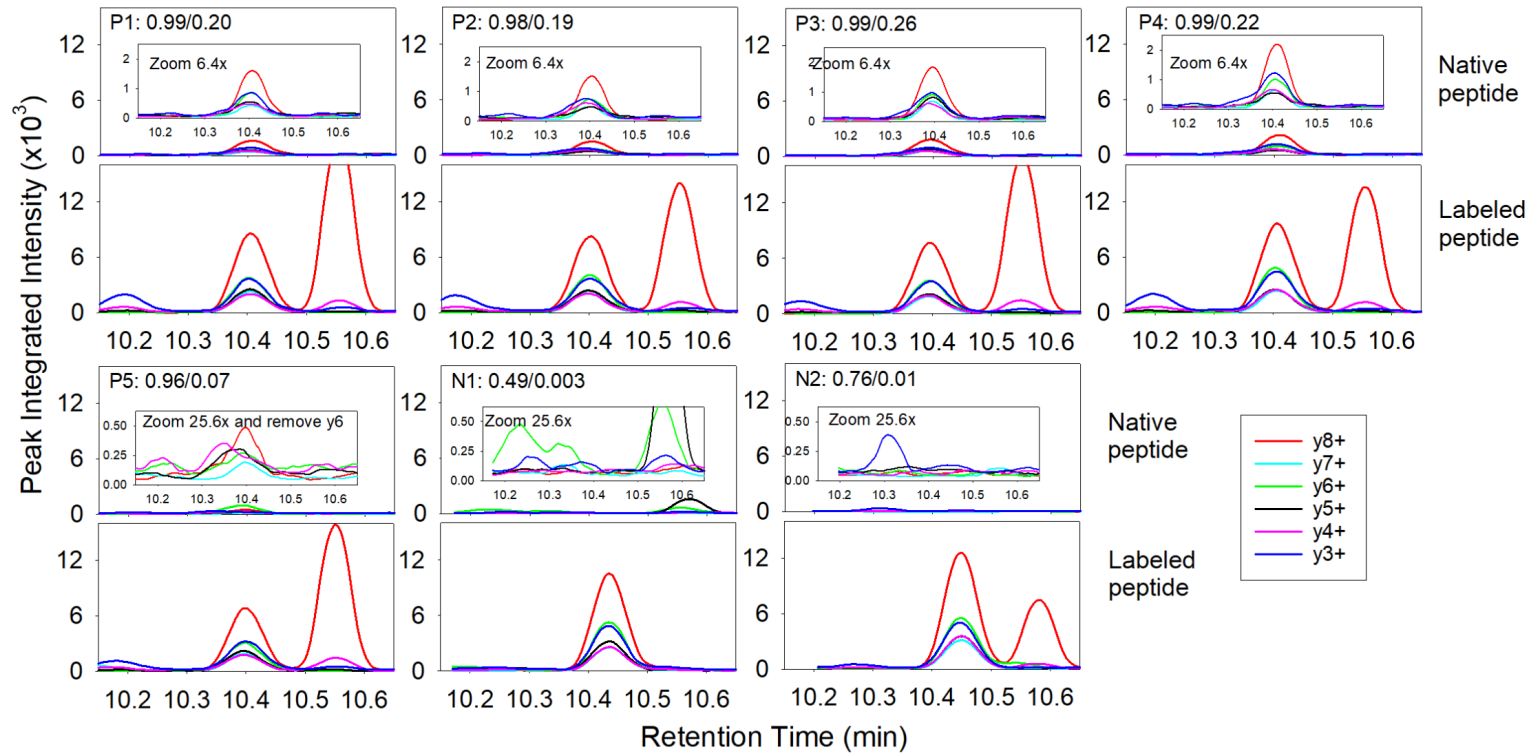

Supplemental Figure 2b: LC-MS chromatograms of SVPAFFWTDK for the five *mcr-1*-containing isolates (P1-P5) and two negative controls (N1 and N2) used in assay development.

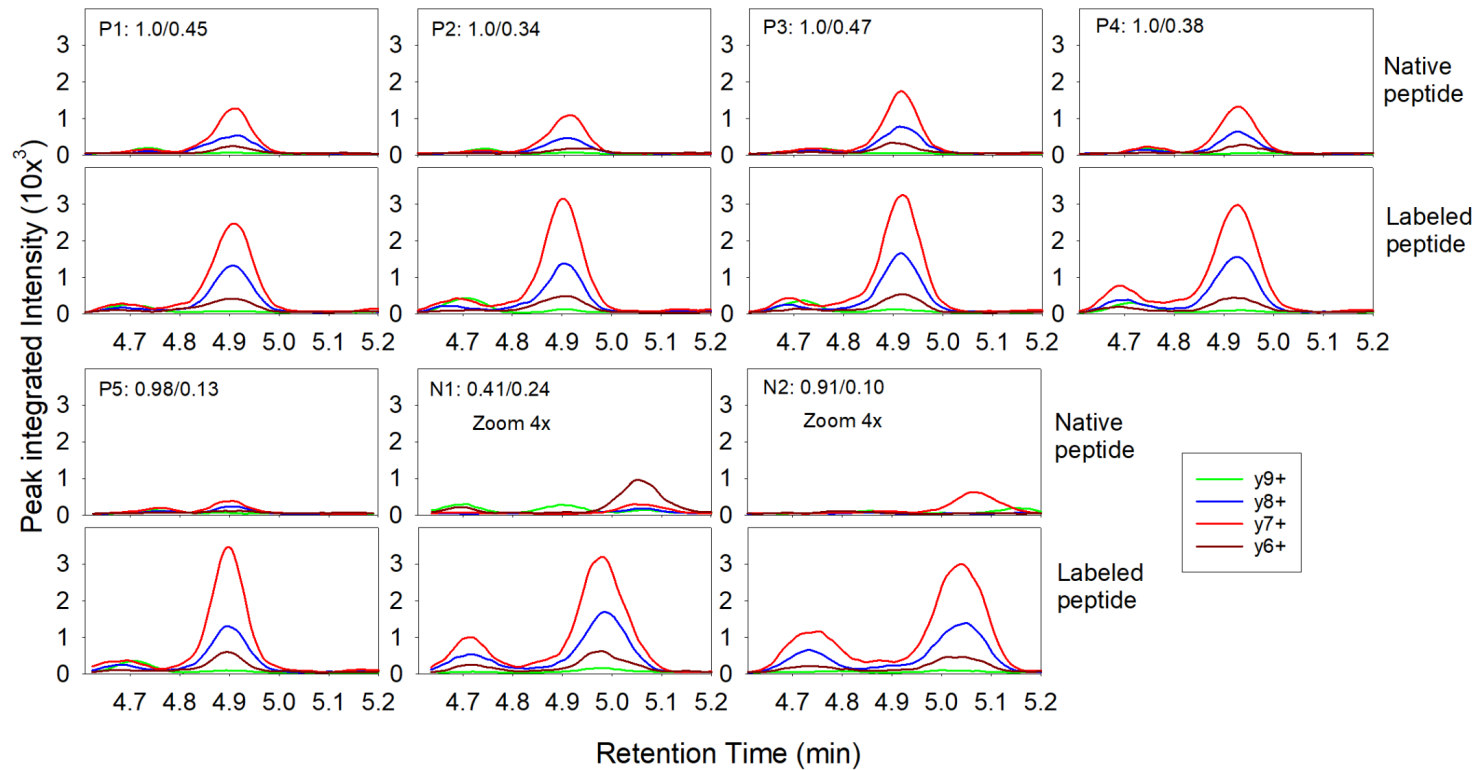

Supplemental Figure 2c: LC-MS chromatograms of ADHVSFNGYER for the five *mcr-1*-containing isolates (P1-P5) and two negative controls (N1 and N2) used in assay development.

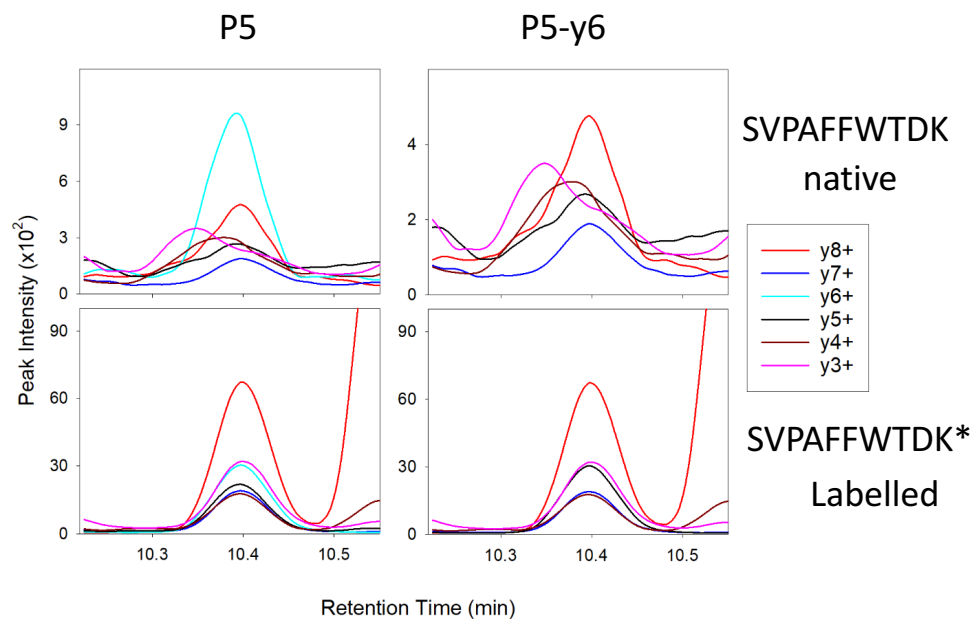

Supplemental Figure 3: For *mcr-1*-containing isolate P5 used in assay development, distortion in the y3 transition, likely due to interference, as well as a fully interfering transition (y6) were observed. Left: original LC-MS chromatogram; Right: LC-MS chromatogram after removal of the interfering transition y6.

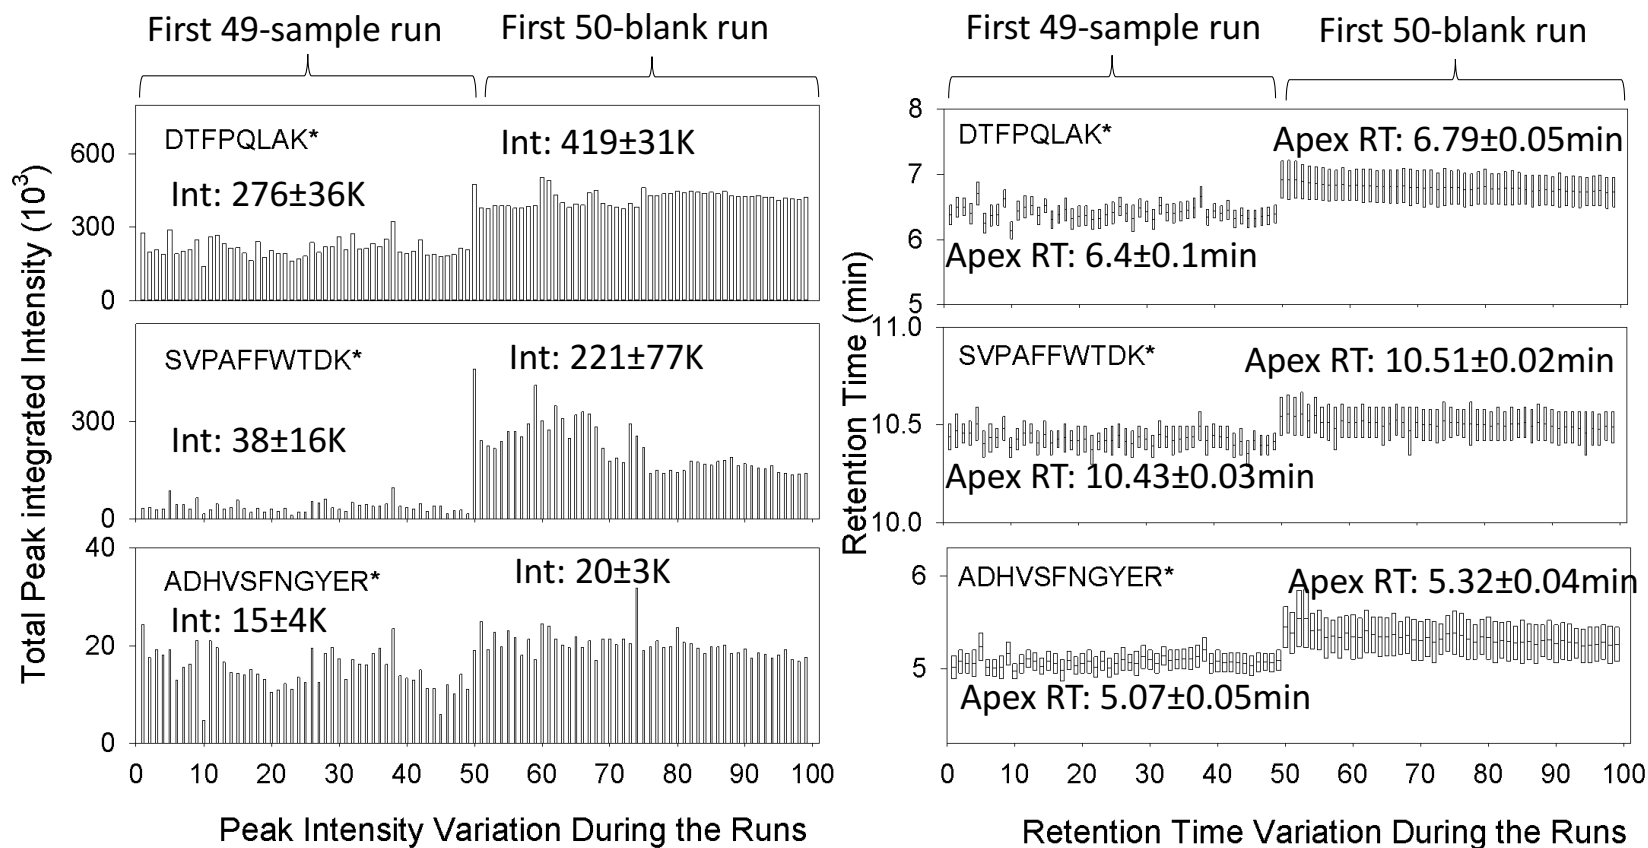

Supplemental Figure 4: Left panel shows peak intensity variation during the first 49-sample and 50 no-matrix blank runs. Right panel shows retention time variation during the first 49-sample and 50 no-matrix blank runs. The no-matrix blank run contained labelled peptides only were run between the samples and were used to monitor instrument performance. Strong matrix effect was observed for SVPAFFWTDK\*

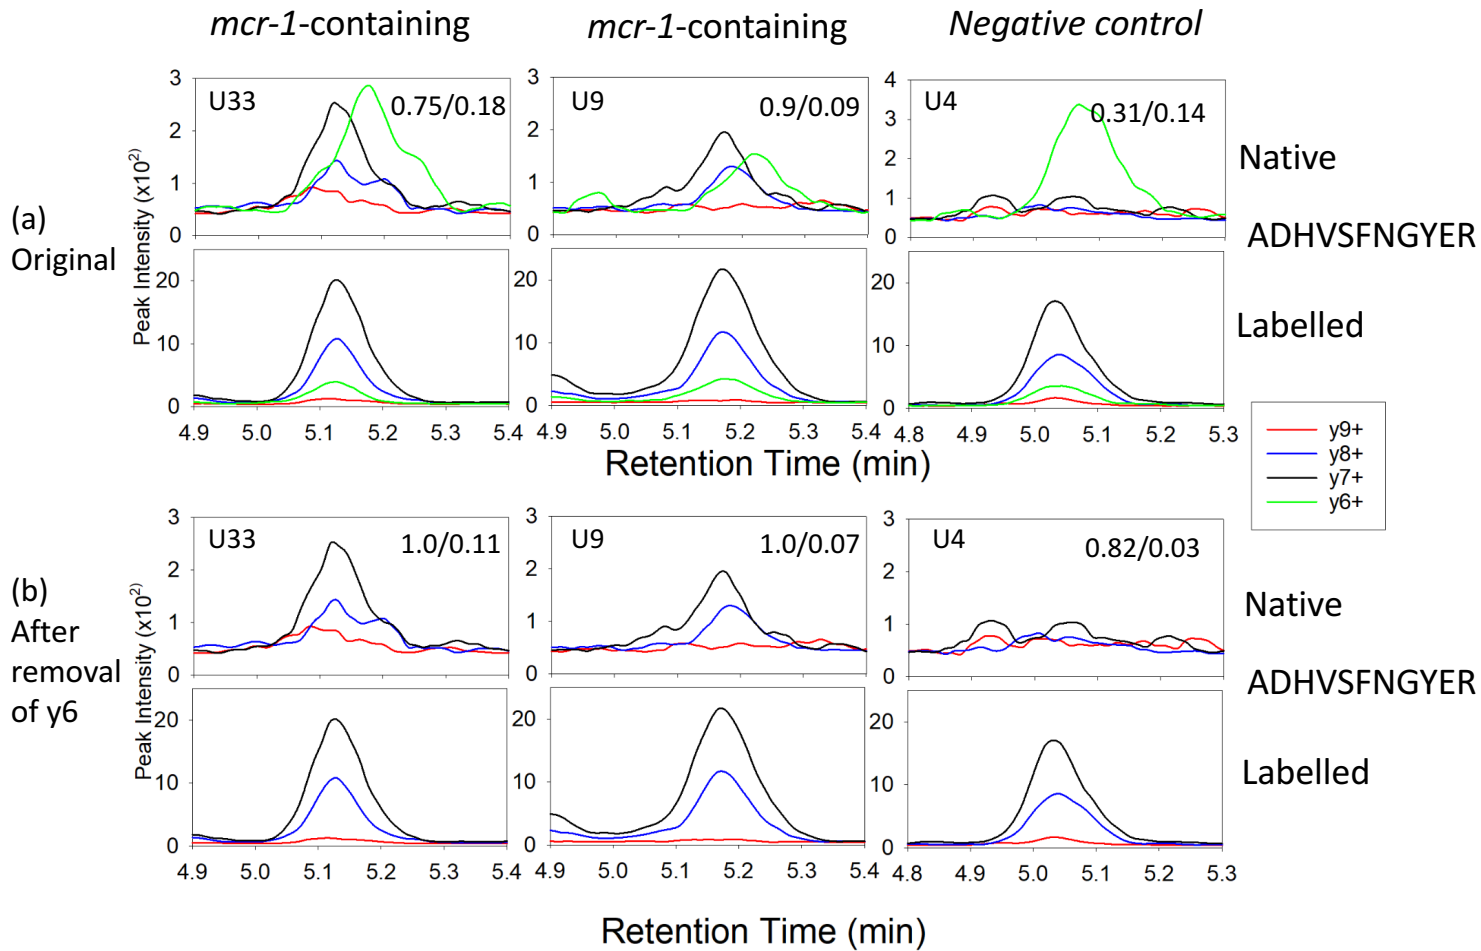

Supplemental Figure 5: y6 interferences were observed in native ADHVSFNGYER peptide. Removal of the y6 transition increased the rdotp value for *mcr-1*-containing isolates. Ratios are given as rdotp/R ratio.



| <b>Supplemental Table 1: Core peptides for 12 MCR-1 variants and calculated ESPredictor values (ESP)</b> |                                      |                    |                        |                     |            |
|----------------------------------------------------------------------------------------------------------|--------------------------------------|--------------------|------------------------|---------------------|------------|
| <b>In silico digested tryptic peptide</b>                                                                | <b># variants containing peptide</b> | <b>aa position</b> | <b>Unique to MCR-1</b> | <b>Note</b>         | <b>ESP</b> |
| DAVQATKPDMR                                                                                              | 12                                   | 225-235            | yes                    | Detected (not used) | 0.40       |
| ADHVSFNGYER                                                                                              | 12                                   | 250-260            | yes                    | Detected            | 0.28       |
| DTFPQLAK                                                                                                 | 12                                   | 261-268            | yes                    | Detected            | 0.76       |
| SVPAFFWTDK                                                                                               | 12                                   | 491-500            | yes                    | Detected            | 0.42       |
| SYVNPIMPIYSVGK                                                                                           | 12                                   |                    | yes                    | Not detected        | 0.53       |
| VDYPTWGK                                                                                                 | 12                                   |                    | yes                    | Not detected        | 0.32       |
| DVGMLVGLDDFVAANNGK                                                                                       | 12                                   |                    | yes                    | Not detected        | 0.30       |
| SATNNAICNTNPYNECR                                                                                        | 12                                   |                    | yes                    | Not detected        | 0.29       |
| IIGLGVLPSSLVAFVK                                                                                         | 12                                   |                    | yes                    | Not detected        | 0.24       |
| DLNAAFIMR                                                                                                | 12                                   |                    | yes                    | Not detected        | 0.23       |
| QTGITPMATDTVLTHDAITPTLLK                                                                                 | 12                                   |                    | yes                    | Not detected        | 0.15       |
| LGLIVASLALILLPVVAFSSHYASFFR                                                                              | 12                                   |                    | yes                    | Not detected        | 0.08       |
| SVSPFVLVASVAVFLTATANLTFFDK                                                                               | 12                                   |                    | yes                    | Not detected        | 0.06       |
| LFDVTADK                                                                                                 | 12                                   |                    | no                     | MCR-2.1             | 0.59       |
| AQFADYK                                                                                                  | 12                                   |                    | no                     |                     | 0.19       |
| DMLIMLHQMGNHGPAYFK                                                                                       | 12                                   |                    | no                     | MCR-2               | 0.09       |
| DNNSDSK                                                                                                  | 12                                   |                    | no                     |                     | 0.05       |
| DTIYHAK                                                                                                  | 12                                   |                    | no                     |                     | 0.07       |
| FTPVCEGNELAK                                                                                             | 12                                   |                    | no                     | MCR-2               | 0.87       |
| LASIEYK                                                                                                  | 12                                   |                    | no                     |                     | 0.28       |
| LVVFVVGETAR                                                                                              | 12                                   |                    | no                     |                     | 0.32       |
| VHKPLR                                                                                                   | 12                                   |                    | no                     |                     | 0.11       |
| LGVSILWR                                                                                                 | 11                                   |                    | yes                    |                     | 0.27       |
| YQENVLDTLDR                                                                                              | 11                                   |                    | no                     | MCR-2               | 0.61       |
| MMQHTSVWYR                                                                                               | 8                                    |                    | yes                    |                     | 0.12       |
| DHTAFIR                                                                                                  | 1                                    |                    | no                     |                     | 0.22       |
| HTSVWYR                                                                                                  | 1                                    |                    | yes                    |                     | 0.11       |
| LGVSFLWR                                                                                                 | 1                                    |                    | yes                    |                     | 0.24       |
| MMLHTSVWYR                                                                                               | 1                                    |                    | yes                    |                     | 0.14       |
| MMQHTSVCYR                                                                                               | 1                                    |                    | yes                    |                     | 0.18       |
| MQHTSVWYR                                                                                                | 1                                    |                    | yes                    |                     | 0.10       |
| VLDTSDR                                                                                                  | 1                                    |                    | no                     |                     | 0.09       |
